# Supplementary material for: In situ generation of turbostratic nickel hydroxide as a nanozyme for salivary glucose sensor
Source: Royal Society of Chemistry journal article supplement (doi:10.1039/d4ra03559c), 2024-01-01
Supplement: d4ra03559c1.pdf [file d4ra03559c1.pdf]

## SUPPORTING INFORMATION

The supporting information includes FESEM images, XRD patterns, electrochemical measurements, and stability studies of the compounds prepared in this study.

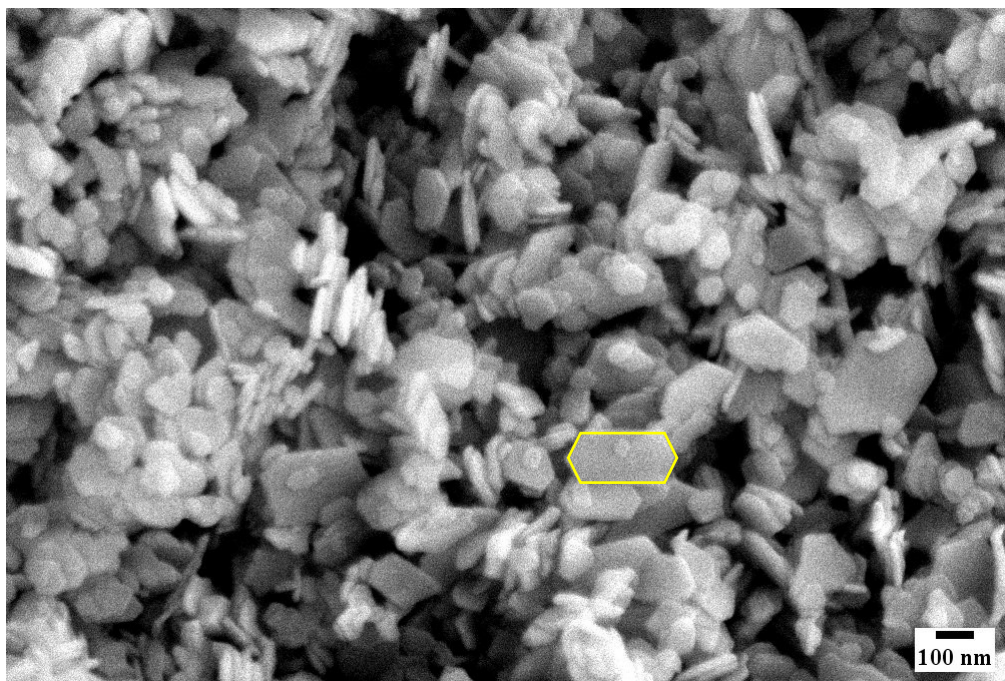

Figure S1. FESEM image of NC-2.

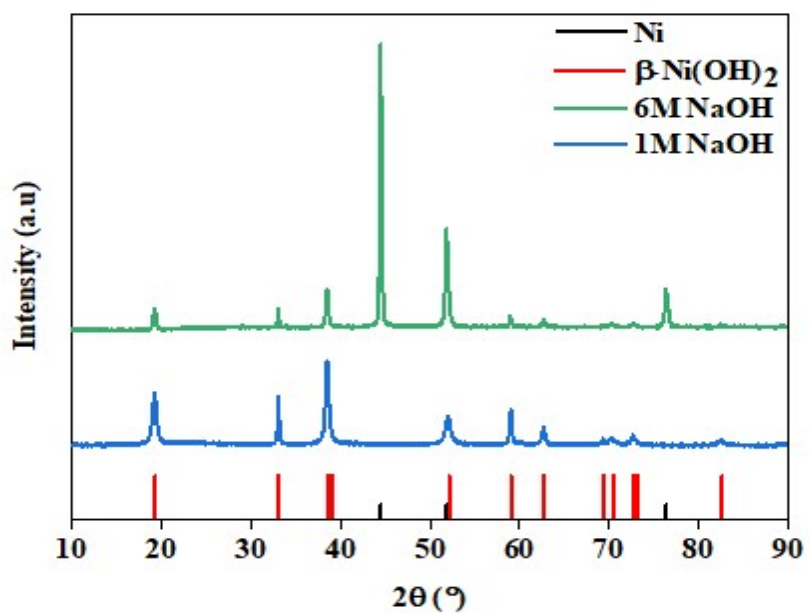

Figure S2. Concentration variation of NaOH for the synthesis of Ni@Ni(OH)<sub>2</sub>.

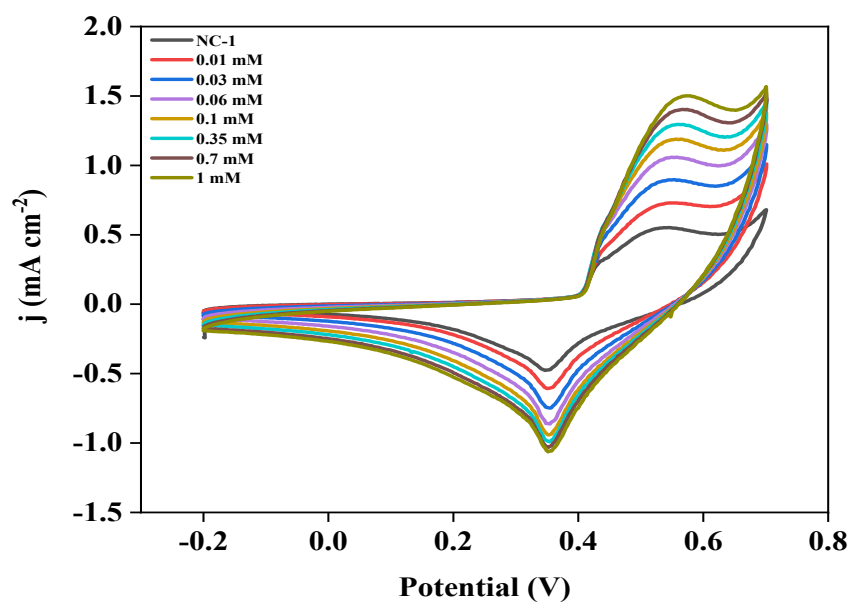

Figure S3. CV of NC-1 with various concentrations of glucose at the scan rate of  $50\text{mV s}^{-1}$ .

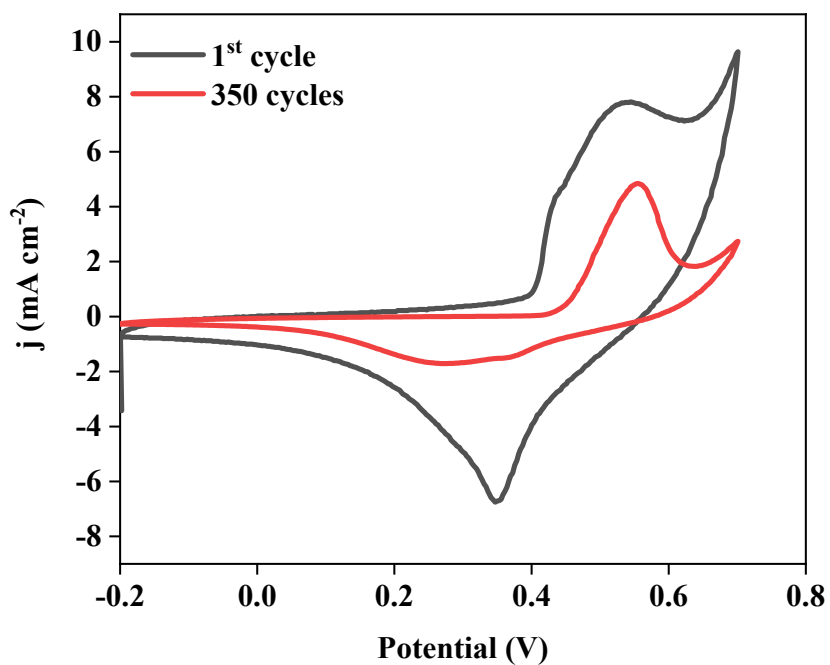

Figure S4. Number of cycles NC-1 from  $\alpha$  to  $\beta$ -Ni(OH)<sub>2</sub>.

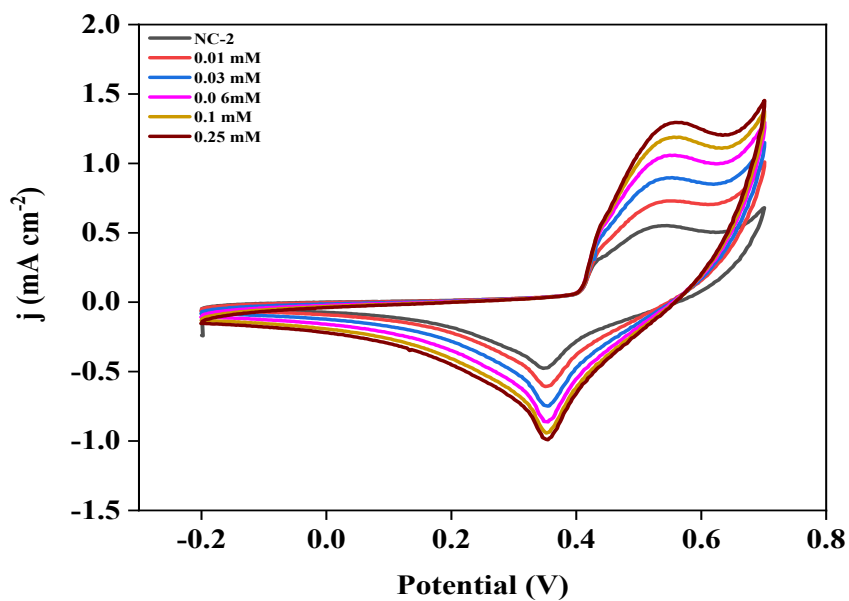

Figure S5. Concentration variation of NC-2 with the addition of glucose (both phases).

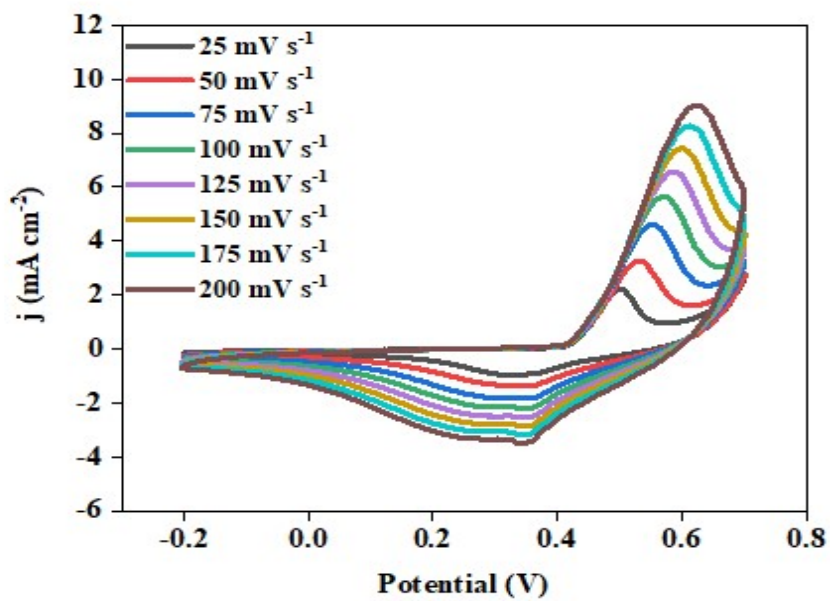

Figure S6. Scan rate variation of NC-1 with 0.5 mM glucose in 0.1 M NaOH.

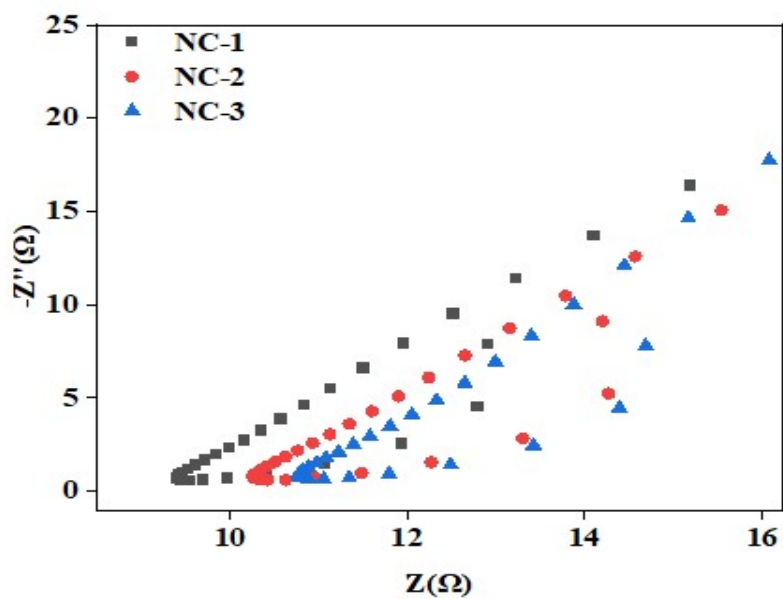

Figure S7. Nyquist plot of as-synthesized compounds with and without glucose addition.

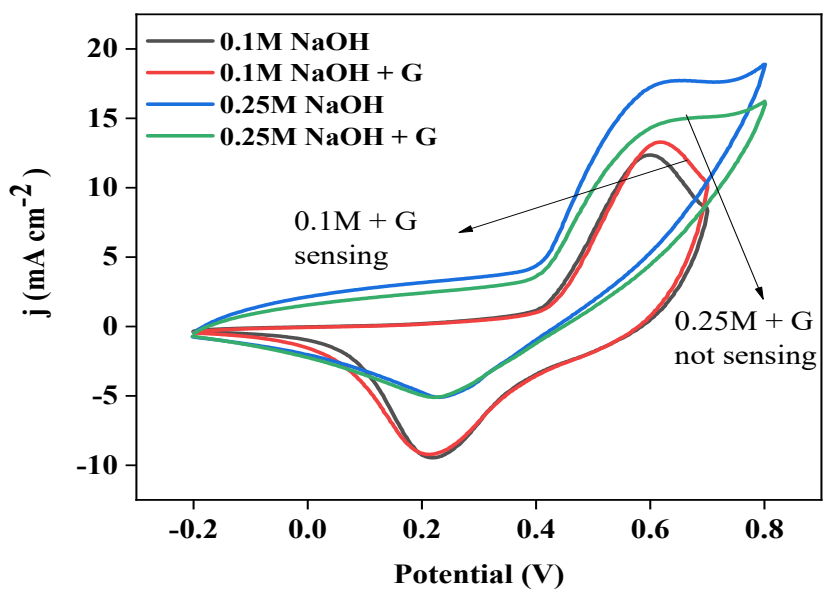

Figure S8. Concentration variation of NaOH in the presence of NC-1 with and without glucose.

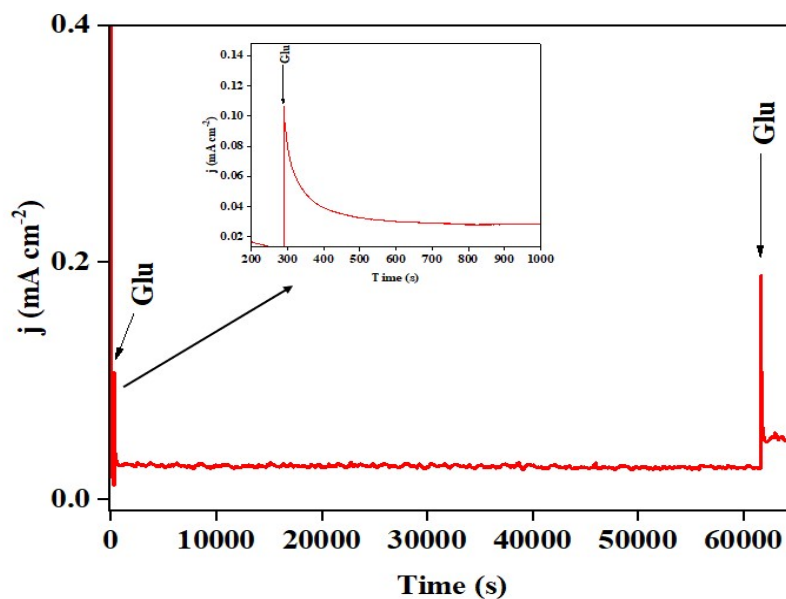

Figure S9. Response of NC-1 with the addition of glucose.

Table S1: Comparison of salivary glucose sensors based on Ni(OH)<sub>2</sub> based nanocomposites

| S.No | Electrode                              | Linear range                       | Detection limit( $\mu\text{M}$ ) | Sensitivity ( $\mu\text{A mM}^{-1} \text{cm}^{-2}$ ) | Reference |
|------|----------------------------------------|------------------------------------|----------------------------------|------------------------------------------------------|-----------|
| 1    | Ni/Ni(OH) <sub>2</sub>                 | 1 $\mu\text{M}$ – 3.1mM            | 9                                | 683                                                  | This work |
| 2    | Ni(OH) <sub>2</sub> &NiOOH film/Ni     | 1 $\mu\text{M}$ – 1.3mM            | 0.414                            | 5.7584                                               | [31]      |
| 3    | $\beta$ -Ni(OH) <sub>2</sub> /NP-Ni/MG | Upto 18mM                          | 0.35                             | 1496                                                 | [48]      |
| 4    | Ni(OH) <sub>2</sub> /CC electrode      | 4 $\mu\text{M}$ – 0.6mM            | 0.47                             | 1942                                                 | [29]      |
| 5    | $\alpha$ -Ni(OH) <sub>2</sub> /rGO/NF  | 0.5 mM – 22.5 mM                   | 0                                | 95.5                                                 | [47]      |
| 6    | Ni(OH) <sub>2</sub> /3DPN templates    | 0.46 $\mu\text{M}$ – 2.1 mM        | 0.46                             | 2761.1                                               | [68]      |
| 7    | Ni(OH) <sub>2</sub> /NND film          | 20 $\mu\text{M}$ – 1 mM;<br>1-9 mM | 1.2                              | 3200,1410                                            | [69]      |
| 8    | Ni(OH) <sub>2</sub> /ITO; NiO/ITO      | 0.1 mM–156 mM;<br>0.01-30 mM       | 70; 8.1                          | 12.09; 24                                            | [44]      |

|   |         |                      |      |      |      |
|---|---------|----------------------|------|------|------|
| 9 | CuO/FTO | 5 $\mu$ M – 0.225 mM | 0.41 | 3072 | [70] |
|---|---------|----------------------|------|------|------|
